# Supplementary material
Source: PubMed Central journal article supplement (PMC4889757)
Supplement: SD8.pdf [file SD8.pdf]

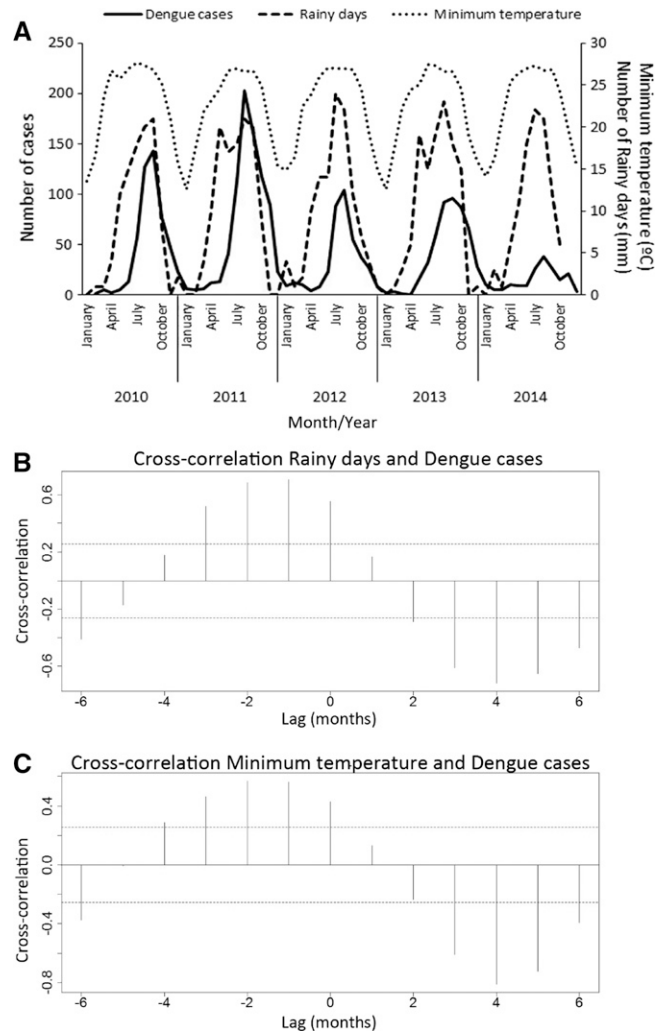

SUPPLEMENTAL FIGURE 1. Time series and cross-correlation plots of climatic variables and dengue cases in Dhaka, from 2010 to 2014. **(A)** Time series of the monthly mean minimum temperature, number of rainy days, and dengue cases. **(B)** Cross-correlation plot of monthly dengue cases and number of rainy days. **(C)** Cross-correlation plot of monthly dengue cases and mean minimum temperature. The  $x$  axis gives the number of lags per month, and the  $y$  axis gives the value of the correlation coefficient between  $-1$  and  $1$ . Dotted lines indicate the 95% confidence level.
